# Supplementary material for: In situ conversion of ZnO into zeolitic imidazolate framework-8 in polyamide layers for well-structured high-permeance thin-film nanocomposite nanofiltration membranes
Source: Royal Society of Chemistry journal article supplement (doi:10.1039/d0ta11923g), 2021-01-01
Supplement: d0ta11923g1.pdf [file d0ta11923g1.pdf]

# **In situ converting ZnO to zeolitic imidazolate framework-8 in polyamide layer for well- structured high permeance thin film nanocomposite nanofiltration membrane**

Wentian Zhang, Zhiwen Li, Yanchao Xu\*, Hongjun Lin\*

College of Geography and Environmental Sciences, Zhejiang Normal University,  
Jinhua, China, 321004

\*Corresponding author. Tel.: +86 0579 82282273, Email address: [ycxu@zjnu.edu.cn](mailto:ycxu@zjnu.edu.cn),

[hjlin@zjnu.cn](mailto:hjlin@zjnu.cn)

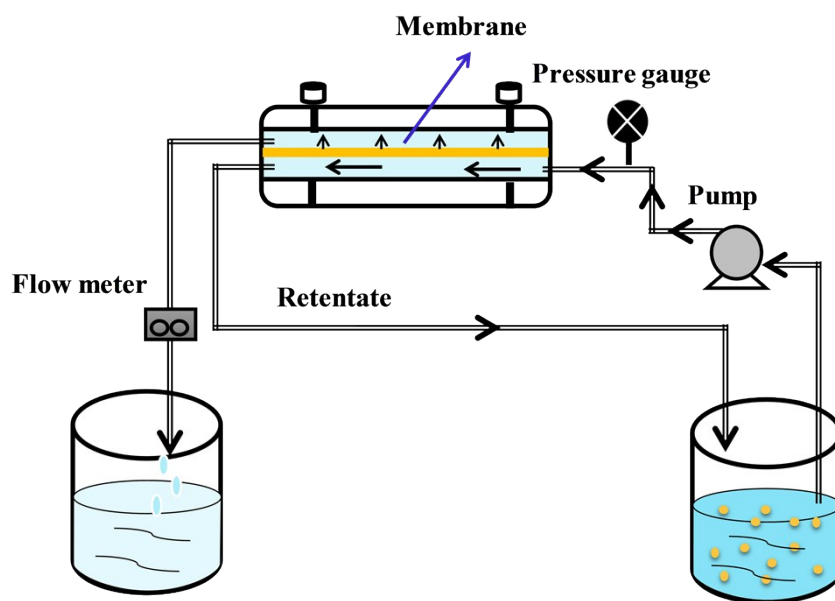

**Fig. S1.** Schematic graph of the separation platform in this study.

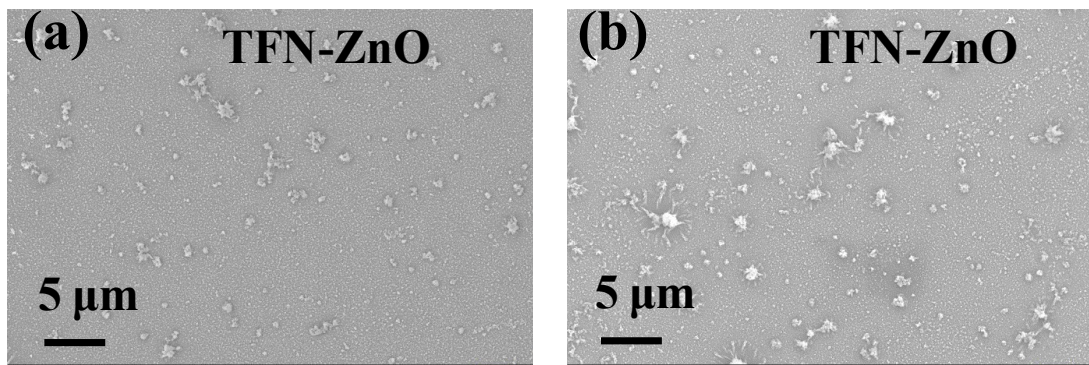

**Figure S2.** Top surface SEM images of TFN-ZnO membrane.

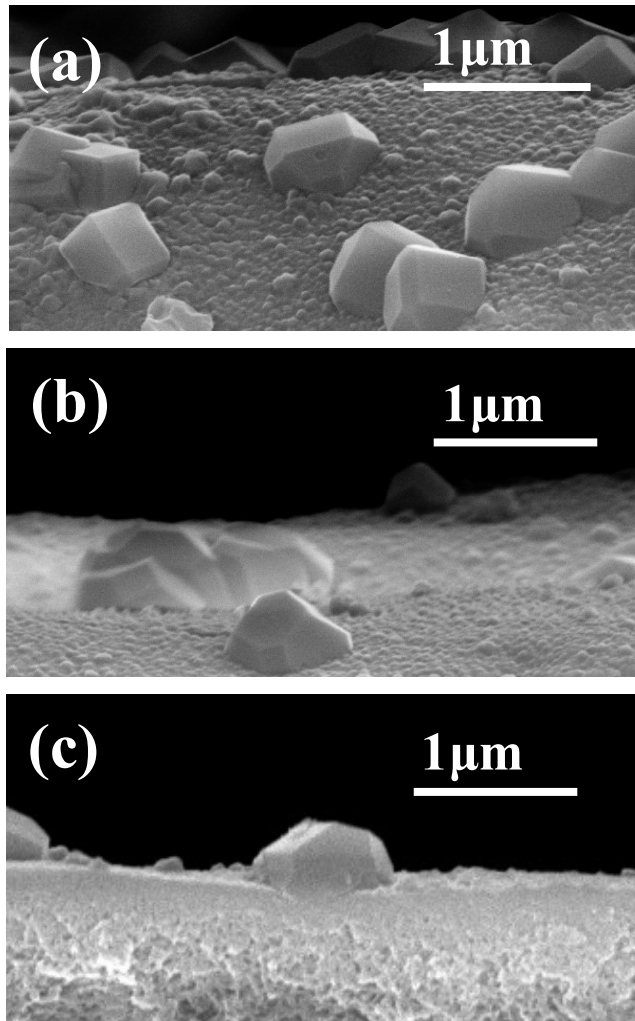

**Figure S3.** SEM images of TFN-ZIF-8 membrane.

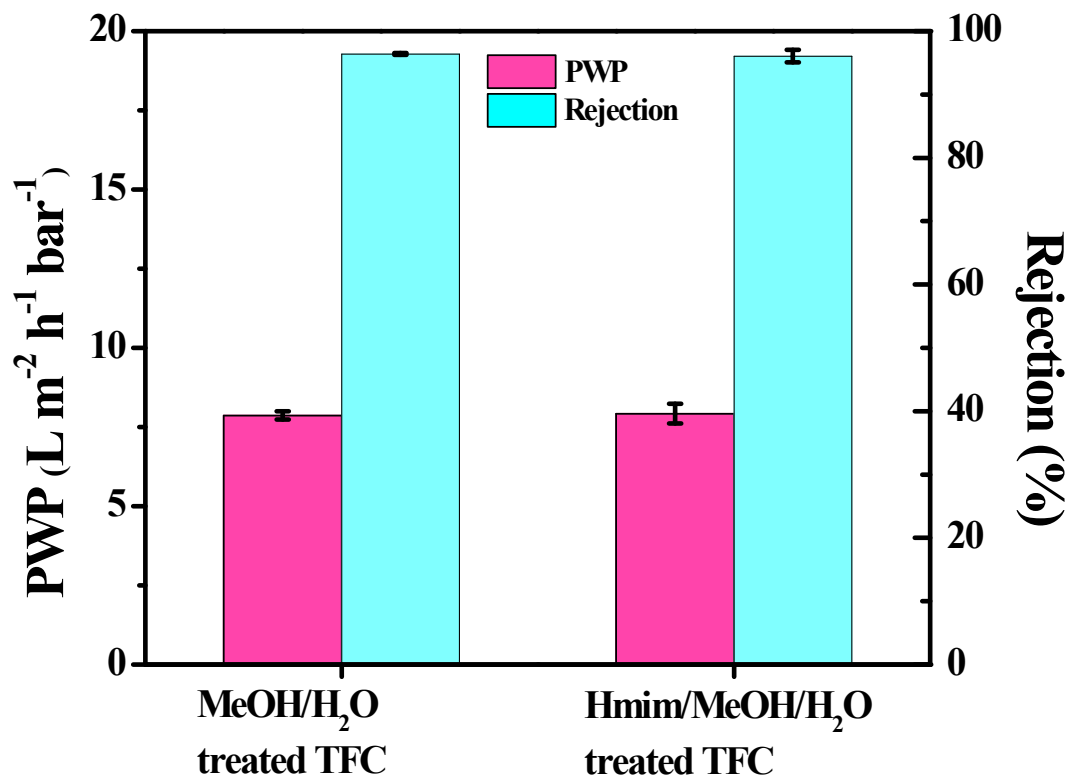

**Figure S4.** Separation performance of TFC membranes treated by a water/methanol solvent and a water/methanol solution of Hmim.

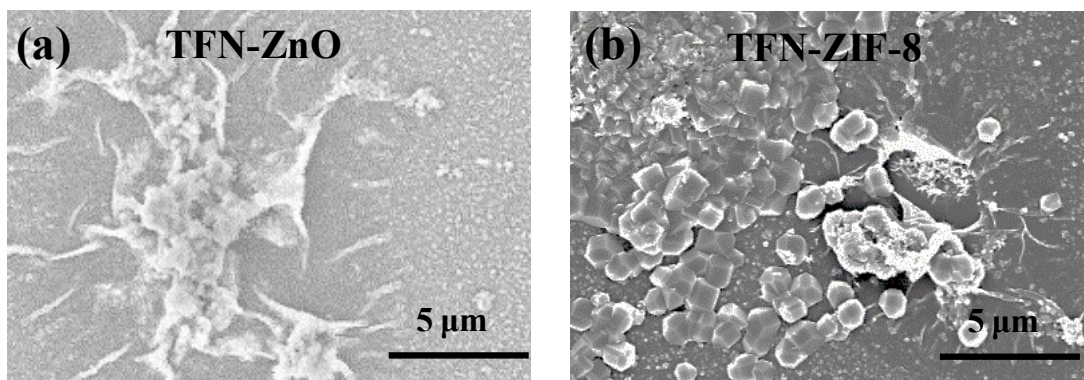

**Figure S5.** SEM images of TFN-ZnO and TFN-ZIF-8 membranes prepared at a ZnO concentration of 0.1%.

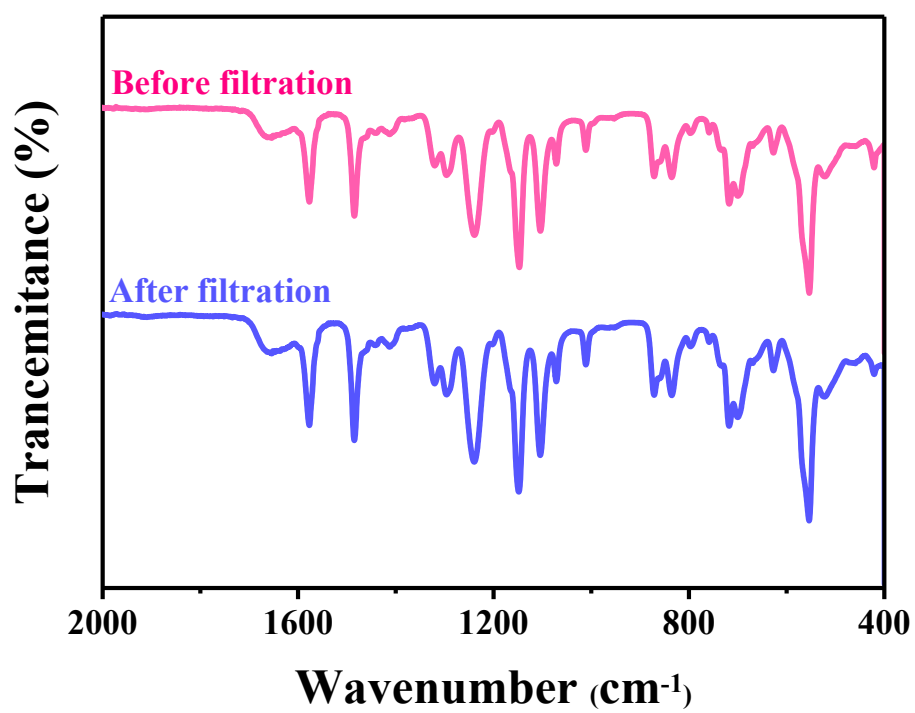

**Figure S6.** ATR-FTIR characterization of TFN-ZIF-8 membrane before and after filtration.

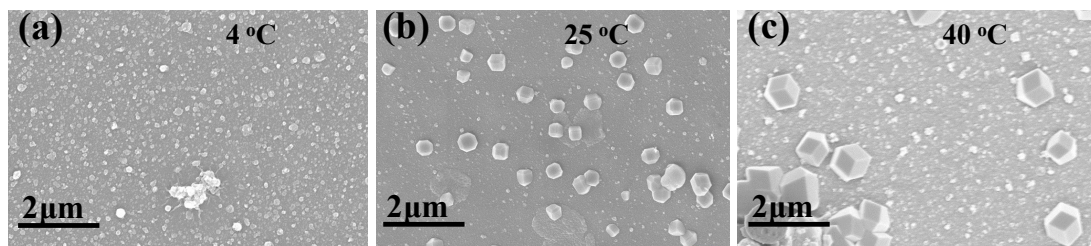

**Figure S7.** SEM images of TFN-ZIF-8 membranes prepared at different reaction temperature.
